# Supplementary material for: Effects of poverty on mental health in the UK working-age population: causal analyses of the UK Household Longitudinal Study
Source: PubMed Central journal article supplement (PMC10114108; doi:10.1093/ije/dyac226), 2022-12-08

## Supplementary Material

Table S1: Variables included within the imputation model

| REGRESSION MODEL                      | VARIABLES                                   | % MISSINGNESS |
|---------------------------------------|---------------------------------------------|---------------|
| LINEAR                                | Log(household income)                       | 2.60%         |
|                                       | One-year lagged log(household income)       | 2.67%         |
|                                       | Interaction: log(income) x gender           | 2.60%         |
|                                       | Interaction: log(income) x education        | 13.98%        |
|                                       | Interaction: log(income) x age              | 2.60%         |
| TRUNCATED LINEAR<br>(RANGE 0 TO 100)  | SF-12 physical component score (PCS)        | 12.41%        |
|                                       | One-year lagged SF-12 PCS                   | 12.73%        |
|                                       | SF-12 mental component score (MCS)          | 12.41%        |
|                                       | One-year lagged SF-12 MCS                   | 12.73%        |
| LOGISTIC                              | Employment status                           | 5.21%         |
|                                       | One-year lagged employment status           | 4.67%         |
|                                       | If in receipt of benefits (benefit status)  | 0.48%         |
|                                       | One-year lagged benefit status              | 0.34%         |
|                                       | Home ownership status                       | 1.11%         |
|                                       | One-year lagged home ownership status       | 0.97%         |
|                                       | Marital status (coupled versus not coupled) | 0.13%         |
|                                       | One-year lagged marital status              | 0.13%         |
|                                       | Ethnicity (white/non-white)                 | 1.75%         |
|                                       | ORDERED LOGIT                               | GHQ-12 score  |
| One-year lagged GHQ-12 score          |                                             | 12.76%        |
| Highest education                     |                                             | 11.67%        |
| COMPLETE<br>(IMPUTATION<br>VARIABLES) | Gender                                      | 0%            |
|                                       | Government office region                    | 0%            |
|                                       | One-year lagged government office region    | 0%            |
|                                       | Number of own children in household         | 0%            |
|                                       | One-year lagged number of children          | 0%            |
|                                       | Study wave                                  | 0%            |

Table S2: Characteristics of included observations

|                             | COMPLETE CASES<br>n = 32,138; obs = 132,962 |                  | IMPUTED DATA<br>n = 45,497; obs = 202,297 |                  |
|-----------------------------|---------------------------------------------|------------------|-------------------------------------------|------------------|
|                             | Continuous variables: Mean (SD), Range      |                  |                                           |                  |
| Age                         | 45.36 (10.90)                               | 25.00 to 64.00   | 45.31 (10.93)                             | 25.00 to 64.00   |
| Monthly household income    | £1633.34 (1707.72)                          | £0.04 to £201671 | £1568.82 (2015.52)                        | £0.04 to £202620 |
| Household income (t-1)      | £1581.62 (1773.26)                          | £0.04 to £202620 | £1519.30 (2019.67)                        | £0.04 to £220830 |
| GHQ-12 score                | 1.81 (3.08)                                 | 0.00 to 12.00    | 1.88 (3.13)                               | 0.00 to 12.00    |
| GHQ-12 score (t-1)          | 1.81 (3.05)                                 | 0.00 to 12.00    | 1.89 (3.11)                               | 0.00 to 12.00    |
| Number of children          | 0.71 (1.01)                                 | 0.00 to 9.00     | 0.73 (1.05)                               | 0.00 to 9.00     |
| Number of children (t-1)    | 0.72 (1.02)                                 | 0.00 to 9.00     | 0.74 (1.05)                               | 0.00 to 9.00     |
| SF-12 physical health       | 51.09 (10.14)                               | 4.64 to 76.29    | 50.61 (10.45)                             | 2.34 to 90.76    |
| SF-12 physical health (t-1) | 51.31 (10.00)                               | 4.48 to 76.29    | 50.85 (10.32)                             | 3.81 to 91.26    |
| SF-12 mental health         | 48.80 (9.87)                                | 0.00 to 76.62    | 48.58 (10.04)                             | 0.00 to 80.81    |
| SF-12 mental health (t-1)   | 49.07 (9.80)                                | 0.00 to 77.09    | 48.85 (9.98)                              | 0.00 to 81.89    |
|                             | Categorical variables: Frequency (%)        |                  |                                           |                  |

|                          |                        |                  |                        |                  |
|--------------------------|------------------------|------------------|------------------------|------------------|
| Gender                   | Male                   | 57,051 (42.91%)  | Male                   | 90,369 (44.67%)  |
|                          | Female                 | 75,911 (57.09%)  | Female                 | 111,928 (55.33%) |
| Educational attainment   | High                   | 56,924 (42.81%)  | High                   | 82,080 (40.57%)  |
|                          | Medium                 | 49,886 (37.52%)  | Medium                 | 75,559 (37.35%)  |
|                          | Low                    | 26,152 (19.67%)  | Low                    | 44,658 (22.08%)  |
| Age group                | Younger (25-40)        | 47,023 (35.37%)  | Younger (25-40)        | 71,777 (35.48%)  |
|                          | Older (41-64)          | 85,939 (64.63%)  | Older 41-64)           | 130,520 (64.52%) |
| Ethnicity                | White                  | 114,778 (86.32%) | White                  | 166,621 (82.36%) |
|                          | Non-white              | 18,184 (13.68%)  | Non-white              | 35,676 (17.64%)  |
| In poverty?              | Yes                    | 25,954 (19.52%)  | Yes                    | 45,305 (22.40%)  |
|                          | No                     | 107,008 (80.48%) | No                     | 156,992 (77.60%) |
| In poverty? (t-1)        | Yes                    | 26,231 (19.73%)  | Yes                    | 45,830 (22.65%)  |
|                          | No                     | 106,731 (80.27%) | No                     | 156,467 (77.35%) |
| Poverty transition       | Never in poverty       | 97,690 (73.47%)  | Never in poverty       | 141,576 (69.98%) |
|                          | Moved out of poverty   | 9,318 (7.01%)    | Moved out of poverty   | 15,417 (7.62%)   |
|                          | Moved into poverty     | 9,041 (6.80%)    | Moved into poverty     | 14,891 (7.36%)   |
|                          | Persistent poverty     | 16,913 (12.72%)  | Persistent poverty     | 30,413 (15.03%)  |
| GHQ-12 caseness          | Yes                    | 25,185 (18.94%)  | Yes                    | 40,164 (19.85%)  |
|                          | No                     | 107,777 (81.06%) | No                     | 162,133 (80.15%) |
| GHQ-12 caseness (t-1)    | Yes                    | 25,102 (18.88%)  | Yes                    | 40,177 (19.86%)  |
|                          | No                     | 107,860 (81.12%) | No                     | 162,120 (80.14%) |
| In employment?           | Yes                    | 103,700 (77.99%) | Yes                    | 150,418 (74.35%) |
|                          | No                     | 29,262 (22.01%)  | No                     | 51,879 (25.65%)  |
| In employment? (t-1)     | Yes                    | 104,115 (78.30%) | Yes                    | 151,007 (74.65%) |
|                          | No                     | 28,847 (21.70%)  | No                     | 51,290 (25.35%)  |
| Receives benefits?       | Yes                    | 83,508 (62.81%)  | Yes                    | 131,899 (65.20%) |
|                          | No                     | 49,454 (37.19%)  | No                     | 70,398 (34.80%)  |
| Receives benefits? (t-1) | Yes                    | 83,335 (62.68%)  | Yes                    | 131,560 (65.03%) |
|                          | No                     | 49,627 (37.32%)  | No                     | 70,737 (34.97%)  |
| Owns home?               | Yes                    | 98,228 (73.88%)  | Yes                    | 143,339 (70.86%) |
|                          | No                     | 34,734 (26.12%)  | No                     | 58,958 (29.14%)  |
| Owns home? (t-1)         | Yes                    | 97,760 (73.52%)  | Yes                    | 142,772 (70.58%) |
|                          | No                     | 35,202 (26.48%)  | No                     | 59,525 (29.42%)  |
| Has partner?             | Yes                    | 99,408 (74.76%)  | Yes                    | 149,911 (74.10%) |
|                          | No                     | 33,554 (25.24%)  | No                     | 52,387 (25.90%)  |
| Has partner? (t-1)       | Yes                    | 99,027 (74.48%)  | Yes                    | 149,408 (73.86%) |
|                          | No                     | 33,935 (25.52%)  | No                     | 52,889 (26.14%)  |
| Govt. office region      | North East             | 5,548 (4.17%)    | North East             | 7,596 (3.75%)    |
|                          | North West             | 14,495 (10.90%)  | North West             | 20,490 (10.13%)  |
|                          | Yorkshire & the Humber | 11,152 (8.39%)   | Yorkshire & the Humber | 16,681 (8.25%)   |
|                          | East Midlands          | 10,398 (7.82%)   | East Midlands          | 15,057 (7.44%)   |
|                          | West Midlands          | 11,359 (8.54%)   | West Midlands          | 16,538 (8.18%)   |
|                          | East of England        | 12,281 (9.24%)   | East of England        | 17,214 (8.51%)   |
|                          | London                 | 14,326 (10.77%)  | London                 | 26,806 (13.25%)  |
|                          | South East             | 17,150 (12.90%)  | South East             | 23,884 (11.81%)  |
|                          | South West             | 12,041 (9.06%)   | South West             | 15,917 (7.87%)   |
|                          | Wales                  | 7,507 (5.65%)    | Wales                  | 12,887 (6.37%)   |
|                          | Scotland               | 10,833 (8.15%)   | Scotland               | 16,846 (8.33%)   |
|                          | Northern Ireland       | 5,872 (4.42%)    | Northern Ireland       | 12,381 (6.12%)   |

|                           |                        |                 |                        |                 |
|---------------------------|------------------------|-----------------|------------------------|-----------------|
| Govt. office region (t-1) | North East             | 5,541 (4.17%)   | North East             | 7,590 (3.75%)   |
|                           | North West             | 14,500 (10.91%) | North West             | 20,488 (10.13%) |
|                           | Yorkshire & the Humber | 11,142 (8.38%)  | Yorkshire & the Humber | 16,669 (8.24%)  |
|                           | East Midlands          | 10,380 (7.81%)  | East Midlands          | 15,042 (7.44%)  |
|                           | West Midlands          | 11,334 (8.52%)  | West Midlands          | 16,523 (8.17%)  |
|                           | East of England        | 12,254 (9.22%)  | East of England        | 17,163 (8.48%)  |
|                           | London                 | 14,432 (10.85%) | London                 | 26,999 (13.35%) |
|                           | South East             | 17,174 (12.92%) | South East             | 23,860 (11.79%) |
|                           | South West             | 12,001 (9.03%)  | South West             | 15,870 (7.84%)  |
|                           | Wales                  | 7,513 (5.65%)   | Wales                  | 12,887 (6.37%)  |
|                           | Scotland               | 10,820 (8.14%)  | Scotland               | 16,822 (8.32%)  |
|                           | Northern Ireland       | 5,871 (4.42%)   | Northern Ireland       | 12,384 (6.12%)  |

Table S3: Standardised mean differences of confounding variables between exposed and unexposed groups in primary and stratified analyses, before and after application of inverse probability of treatment weights (IPTWs)

|                    | Whole imputed sample |            | Complete cases |            | Into poverty |            | Out of poverty |            | Men       |            | Women     |            |
|--------------------|----------------------|------------|----------------|------------|--------------|------------|----------------|------------|-----------|------------|-----------|------------|
|                    | Pre-IPTWs            | Post-IPTWs | Pre-IPTWs      | Post-IPTWs | Pre-IPTWs    | Post-IPTWs | Pre-IPTWs      | Post-IPTWs | Pre-IPTWs | Post-IPTWs | Pre-IPTWs | Post-IPTWs |
| Gender             | -0.074               | -0.028     | -0.079         | -0.035     | -0.055       | -0.031     | 0.004          | -0.007     | .         | .          | .         | .          |
| Educ: Medium       | 0.108                | 0.019      | 0.167          | 0.027      | 0.096        | 0.016      | -0.027         | 0.000      | 0.060     | 0.023      | 0.147     | 0.018      |
| Educ: Low          | 0.285                | 0.017      | 0.244          | 0.010      | 0.182        | 0.026      | -0.087         | 0.000      | 0.283     | 0.008      | 0.290     | 0.024      |
| Ethnicity          | 0.412                | 0.028      | 0.293          | 0.031      | 0.288        | 0.040      | -0.096         | 0.004      | 0.412     | 0.030      | 0.410     | 0.027      |
| Age                | -0.290               | -0.033     | -0.294         | -0.040     | -0.212       | -0.016     | 0.098          | 0.005      | -0.200    | -0.038     | -0.356    | -0.028     |
| Age squared        | -0.290               | -0.030     | -0.291         | -0.036     | -0.208       | -0.014     | 0.101          | 0.005      | -0.200    | -0.037     | -0.356    | -0.025     |
| Unemployed?        | 0.663                | 0.023      | 0.653          | 0.013      | 0.475        | 0.036      | -0.296         | -0.003     | 0.602     | 0.010      | 0.700     | 0.029      |
| Prev unemployed?   | 0.620                | 0.061      | 0.601          | 0.065      | 0.289        | 0.125      | -0.078         | -0.011     | 0.537     | 0.069      | 0.672     | 0.055      |
| No. children       | 0.486                | 0.008      | 0.471          | 0.013      | 0.302        | 0.025      | -0.194         | 0.000      | 0.428     | 0.004      | 0.526     | 0.015      |
| Partner?           | -0.282               | -0.043     | -0.319         | -0.039     | -0.190       | -0.058     | 0.043          | 0.003      | -0.148    | -0.051     | -0.371    | -0.041     |
| Receive benefits?  | 0.599                | 0.051      | 0.631          | 0.049      | 0.412        | 0.038      | -0.149         | 0.000      | 0.587     | 0.039      | 0.603     | 0.057      |
| Homeowner?         | -1.068               | -0.043     | -1.059         | -0.045     | -0.652       | -0.035     | 0.274          | 0.005      | -1.024    | -0.042     | -1.099    | -0.045     |
| North West         | -0.001               | -0.017     | 0.010          | -0.019     | -0.007       | -0.020     | -0.005         | 0.001      | 0.003     | -0.022     | -0.004    | -0.014     |
| Yorkshire          | 0.030                | 0.005      | 0.033          | 0.009      | 0.022        | 0.003      | 0.001          | -0.002     | 0.031     | 0.007      | 0.031     | 0.005      |
| East Midlands      | -0.043               | 0.007      | -0.033         | 0.012      | -0.029       | 0.006      | 0.022          | -0.001     | -0.031    | 0.012      | -0.051    | 0.005      |
| West Midlands      | 0.023                | 0.009      | 0.022          | 0.011      | 0.010        | 0.010      | -0.012         | -0.001     | 0.014     | 0.010      | 0.030     | 0.008      |
| East of England    | -0.029               | -0.002     | -0.014         | -0.007     | -0.012       | -0.008     | 0.004          | -0.004     | -0.027    | 0.004      | -0.030    | -0.006     |
| London             | 0.221                | 0.005      | 0.114          | 0.002      | 0.145        | 0.011      | -0.060         | 0.000      | 0.206     | 0.003      | 0.231     | 0.008      |
| South East         | -0.077               | -0.011     | -0.057         | -0.012     | -0.053       | -0.007     | 0.010          | 0.002      | -0.059    | -0.016     | -0.091    | -0.009     |
| South West         | -0.051               | 0.004      | -0.021         | 0.015      | -0.024       | 0.003      | 0.034          | 0.002      | -0.056    | 0.011      | -0.046    | -0.001     |
| Wales              | -0.014               | 0.002      | 0.007          | 0.006      | -0.012       | 0.009      | -0.001         | -0.001     | -0.012    | 0.001      | -0.015    | 0.002      |
| Scotland           | -0.106               | -0.009     | -0.075         | -0.009     | -0.060       | -0.017     | 0.036          | 0.002      | -0.106    | -0.009     | -0.106    | -0.008     |
| Northern Ireland   | -0.027               | 0.012      | -0.024         | 0.005      | -0.011       | 0.019      | 0.003          | 0.003      | -0.027    | 0.014      | -0.028    | 0.011      |
| Prev GHQ case?     | 0.216                | 0.045      | 0.226          | 0.052      | 0.146        | 0.058      | -0.016         | 0.000      | 0.217     | 0.040      | 0.207     | 0.045      |
| SF-12 Phys. Health | -0.292               | -0.044     | -0.291         | -0.046     | -0.227       | -0.053     | 0.037          | -0.009     | -0.325    | -0.021     | -0.265    | -0.058     |
| SF-12 Ment. Health | -0.299               | -0.047     | -0.319         | -0.050     | -0.208       | -0.064     | 0.052          | -0.006     | -0.289    | -0.048     | -0.297    | -0.042     |
| Prev. poverty      | 1.458                | 0.022      | 1.442          | 0.022      | .            | .          | .              | .          | 1.467     | 0.015      | 1.447     | 0.029      |

|                    | High education |            | Medium education |            | Low education |            | Younger working-age |            | Older working-age |            |
|--------------------|----------------|------------|------------------|------------|---------------|------------|---------------------|------------|-------------------|------------|
|                    | Pre-IPTWs      | Post-IPTWs | Pre-IPTWs        | Post-IPTWs | Pre-IPTWs     | Post-IPTWs | Pre-IPTWs           | Post-IPTWs | Pre-IPTWs         | Post-IPTWs |
| Gender             | -0.034         | -0.038     | -0.130           | -0.021     | -0.092        | -0.025     | -0.152              | -0.023     | -0.009            | -0.032     |
| Educ: Medium       | .              | .          | .                | .          | .             | .          | 0.221               | 0.018      | 0.027             | 0.024      |
| Educ: Low          | .              | .          | .                | .          | .             | .          | 0.289               | -0.010     | 0.344             | 0.036      |
| Ethnicity          | 0.541          | 0.045      | 0.427            | 0.021      | 0.382         | 0.010      | 0.348               | 0.002      | 0.425             | 0.041      |
| Age                | -0.326         | -0.064     | -0.427           | -0.034     | -0.318        | 0.007      | -0.035              | -0.036     | -0.186            | -0.007     |
| Age squared        | -0.334         | -0.061     | -0.427           | -0.032     | -0.317        | 0.008      | -0.035              | -0.036     | -0.182            | -0.006     |
| Unemployed?        | 0.529          | 0.011      | 0.611            | 0.016      | 0.687         | 0.033      | 0.774               | 0.010      | 0.648             | 0.035      |
| Prev unemployed?   | 0.468          | 0.081      | 0.572            | 0.045      | 0.654         | 0.054      | 0.707               | 0.042      | 0.601             | 0.078      |
| No. children       | 0.495          | 0.023      | 0.564            | 0.016      | 0.459         | -0.023     | 0.621               | -0.006     | 0.299             | 0.014      |
| Partner?           | -0.244         | -0.062     | -0.246           | -0.037     | -0.333        | -0.021     | -0.087              | -0.014     | -0.405            | -0.052     |
| Receive benefits?  | 0.509          | 0.047      | 0.600            | 0.044      | 0.555         | 0.047      | 0.616               | 0.034      | 0.569             | 0.065      |
| Homeowner?         | -0.984         | -0.052     | -1.051           | -0.034     | -1.048        | -0.040     | -0.994              | -0.031     | -1.059            | -0.047     |
| North West         | -0.002         | -0.019     | -0.012           | -0.024     | 0.021         | -0.005     | -0.004              | -0.006     | -0.007            | -0.025     |
| Yorkshire          | 0.009          | 0.013      | 0.007            | 0.005      | 0.049         | 0.001      | 0.015               | 0.010      | 0.034             | 0.002      |
| East Midlands      | -0.066         | -0.011     | -0.051           | 0.023      | -0.052        | 0.000      | -0.029              | -0.021     | -0.052            | 0.022      |
| West Midlands      | -0.013         | 0.011      | 0.006            | 0.006      | 0.065         | 0.015      | 0.015               | 0.007      | 0.027             | 0.008      |
| East of England    | -0.003         | -0.016     | -0.033           | 0.005      | -0.034        | -0.003     | -0.006              | -0.006     | -0.047            | 0.000      |
| London             | 0.298          | 0.015      | 0.251            | -0.003     | 0.263         | 0.008      | 0.175               | -0.013     | 0.239             | 0.016      |
| South East         | -0.076         | -0.022     | -0.037           | -0.003     | -0.053        | 0.004      | -0.058              | 0.004      | -0.087            | -0.017     |
| South West         | -0.047         | 0.016      | -0.051           | 0.001      | -0.030        | -0.011     | -0.022              | 0.028      | -0.060            | -0.010     |
| Wales              | -0.054         | 0.006      | -0.003           | 0.002      | -0.077        | -0.003     | -0.008              | -0.005     | -0.015            | 0.007      |
| Scotland           | -0.126         | -0.014     | -0.087           | -0.001     | -0.168        | -0.022     | -0.103              | 0.002      | -0.096            | -0.013     |
| Northern Ireland   | -0.082         | 0.026      | -0.058           | 0.006      | -0.031        | 0.011      | -0.053              | 0.008      | -0.003            | 0.016      |
| Prev GHQ case?     | 0.166          | 0.058      | 0.221            | 0.039      | 0.217         | 0.030      | 0.162               | 0.019      | 0.259             | 0.061      |
| SF-12 Phys. Health | -0.253         | -0.030     | -0.213           | -0.039     | -0.230        | -0.040     | -0.299              | -0.020     | -0.382            | -0.067     |
| SF-12 Ment. Health | -0.232         | -0.062     | -0.310           | -0.028     | -0.305        | -0.045     | -0.210              | -0.019     | -0.344            | -0.062     |
| Prev. poverty      | 1.374          | 0.026      | 1.427            | 0.018      | 1.443         | 0.017      | 1.438               | 0.009      | 1.443             | 0.027      |

*Highlighted cells are those with standardised mean difference  $\geq 0.1$ , indicating a greater than negligible statistical difference between exposed and unexposed groups*

Table S4: Comparative analysis contrasting use of marginal structural modelling (MSM) versus fixed-effects (FE) modelling to estimate causal effects of poverty status on likelihood of common mental disorder

|                                          | Sample size             | FE sample size         | Measure    | Unadj. estimate         | FE estimate             | FE estimate, adj.      | MSM estimate            |
|------------------------------------------|-------------------------|------------------------|------------|-------------------------|-------------------------|------------------------|-------------------------|
| <b>Full sample</b>                       | 45,497<br>(202,297 obs) | 16,207<br>(94,481 obs) | odds ratio | 1.73 (1.67, 1.79)       | 1.22 (1.16, 1.29)       | 1.16 (1.10, 1.23)      | 1.17 (1.12, 1.24)       |
|                                          |                         |                        | % change   | 9.45% (8.83%, 10.08%)   | 5.02% (3.75%, 6.28%)    | 1.49% (0.25%, 2.72%)   | 2.15% (1.45%, 2.84%)    |
| <b>Complete cases</b>                    | 32,138<br>(132,962 obs) | 10,146<br>(56,070 obs) | odds ratio | 1.80 (1.73, 1.88)       | 1.29 (1.21, 1.37)       | 1.23 (1.15, 1.31)      | 1.19 (1.12, 1.27)       |
|                                          |                         |                        | % change   | 9.97% (9.20%, 10.73%)   | 6.28% (4.68%, 7.87%)    | 4.09% (1.73%, 6.45%)   | 2.29% (1.45%, 3.12%)    |
| <b>Into poverty</b>                      | 39,772<br>(156,414 obs) | 12,183<br>(65,685 obs) | odds ratio | 1.65 (1.58, 1.73)       | 1.25 (1.17, 1.35)       | 1.20 (1.11, 1.29)      | 1.21 (1.13, 1.30)       |
|                                          |                         |                        | % change   | 8.35% (7.55%, 9.14%)    | 5.64% (3.87%, 7.41%)    | 2.17% (0.11%, 4.23%)   | 2.46% (1.56%, 3.36%)    |
| <b>Out of poverty</b>                    | 18,206<br>(45,769 obs)  | 4,107<br>(17,247 obs)  | odds ratio | 0.79 (0.75, 0.83)       | 0.83 (0.76, 0.91)       | 0.88 (0.80, 0.97)      | 0.90 (0.85, 0.97)       |
|                                          |                         |                        | % change   | -4.58% (-5.60%, -3.55%) | -4.51% (-6.70%, -2.32%) | -2.29% (-5.11%, 0.52%) | -1.49% (-2.46%, -0.53%) |
| <b>Men</b>                               | 20,891<br>(90,369 obs)  | 6,545<br>(37,354 obs)  | odds ratio | 1.80 (1.71, 1.90)       | 1.27 (1.17, 1.39)       | 1.17 (1.07, 1.28)      | 1.16 (1.07, 1.26)       |
|                                          |                         |                        | % change   | 8.95% (8.04%, 9.86%)    | 6.01% (3.94%, 8.09%)    | 0.49% (-0.38%, 1.36%)  | 1.73% (0.72%, 2.74%)    |
| <b>Women</b>                             | 24,634<br>(111,928 obs) | 9,656<br>(57,289 obs)  | odds ratio | 1.66 (1.59, 1.73)       | 1.19 (1.12, 1.27)       | 1.16 (1.08, 1.24)      | 1.17 (1.10, 1.25)       |
|                                          |                         |                        | % change   | 9.46% (8.61%, 10.30%)   | 4.39% (2.77%, 6.01%)    | 2.36% (0.45%, 4.27%)   | 2.34% (1.41%, 3.26%)    |
| <b>High education</b>                    | 19,987<br>(82,080 obs)  | 6,409<br>(36,828 obs)  | odds ratio | 1.57 (1.48, 1.67)       | 1.28 (1.17, 1.41)       | 1.23 (1.11, 1.35)      | 1.18 (1.07, 1.30)       |
|                                          |                         |                        | % change   | 7.32% (6.25%, 8.40%)    | 6.23% (3.96%, 8.50%)    | 1.78% (-0.63%, 4.19%)  | 2.13% (0.85%, 3.42%)    |
| <b>Medium education</b>                  | 19,576<br>(75,559 obs)  | 5,940<br>(32,754 obs)  | odds ratio | 1.76 (1.67, 1.86)       | 1.20 (1.10, 1.31)       | 1.15 (1.05, 1.26)      | 1.18 (1.09, 1.28)       |
|                                          |                         |                        | % change   | 9.70% (8.73%, 10.68%)   | 4.55% (2.41%, 6.68%)    | 2.56% (-0.06%, 5.18%)  | 2.14% (1.06%, 3.22%)    |
| <b>Low education</b>                     | 12,636<br>(44,658 obs)  | 3,842<br>(19,980 obs)  | odds ratio | 1.68 (1.58, 1.79)       | 1.22 (1.10, 1.36)       | 1.16 (1.04, 1.29)      | 1.17 (1.07, 1.28)       |
|                                          |                         |                        | % change   | 9.63% (8.42%, 10.85%)   | 5.02% (2.44%, 7.61%)    | 2.21% (-1.02%, 5.44%)  | 2.20% (0.90%, 3.49%)    |
| <b>Younger working-age (25-40 years)</b> | 20,384<br>(71,777 obs)  | 6,285<br>(31,655 obs)  | odds ratio | 1.53 (1.45, 1.61)       | 1.18 (1.09, 1.29)       | 1.12 (1.03, 1.22)      | 1.16 (1.07, 1.25)       |
|                                          |                         |                        | % change   | 7.14% (6.25%, 8.03%)    | 4.20% (2.07%, 6.32%)    | 0.20% (-0.37%, 0.76%)  | 2.05% (0.96%, 3.14%)    |
| <b>Older working-age (41-64 years)</b>   | 29,711<br>(130,520 obs) | 10,168<br>(58,737 obs) | odds ratio | 1.90 (1.82, 1.98)       | 1.26 (1.18, 1.36)       | 1.21 (1.12, 1.29)      | 1.18 (1.10, 1.26)       |
|                                          |                         |                        | % change   | 11.25% (10.40%, 12.10%) | 5.84% (4.12%, 7.56%)    | 3.48% (0.09%, 6.87%)   | 2.14% (1.25%, 3.03%)    |

FE sample size excludes those with no variation in outcome across all observations. Unadjusted estimate is from an unweighted logit model with no additional variables. MSM adjusted for both time invariant (gender, education, ethnicity) and time-varying confounders (age, age squared, employment status [current and one year lagged], benefit status [lagged], home ownership status [lagged], marital status [lagged], number of children [lagged], government office region [lagged], SF-12 physical health component [lagged], SF-12 mental health component [lagged], and previous indication of common mental disorder [one-year lagged GHQ-12 caseness]). Adjusted FE model includes time-varying confounders. Absolute risk difference indicates %-point change. Reference group for transition into poverty is those not in poverty in both years; reference group for transition out of poverty is those in poverty in both years.

**Table S5: Causal effect estimates of poverty status on likelihood of common mental disorder (complete cases compared with imputation sample)**

|                                     | <b>Complete cases:<br/>Odds ratio</b> | <b>Imputed results<br/>(Table 1): Odds ratio</b> | <b>Complete cases:<br/>%-point change</b> | <b>Imputed results<br/>(Table 1): %-point change</b> |
|-------------------------------------|---------------------------------------|--------------------------------------------------|-------------------------------------------|------------------------------------------------------|
| <b>Unadjusted estimate</b>          | 1.80 (1.73, 1.88)                     | 1.73 (1.67, 1.79)                                | 9.97% (9.20%, 10.73%)                     | 9.45% (8.83%, 10.08%)                                |
| <b>Fixed-effects estimate</b>       | 1.29 (1.21, 1.37)                     | 1.22 (1.16, 1.29)                                | 6.28% (4.68%, 7.87%)                      | 5.02% (3.75%, 6.28%)                                 |
| <b>Fixed-effects estimate, adj.</b> | 1.23 (1.15, 1.31)                     | 1.16 (1.10, 1.23)                                | 4.09% (1.73%, 6.45%)                      | 1.49% (0.25%, 2.72%)                                 |
| <b>MSM estimate</b>                 | 1.19 (1.12, 1.27)                     | 1.17 (1.12, 1.24)                                | 2.29% (1.45%, 3.12%)                      | 2.15% (1.45%, 2.84%)                                 |
| <b><i>n</i></b>                     | 32,138 (132,962 obs)                  | 45,497 (202,297 obs)                             | 32,138 (132,962 obs)                      | 45,497 (202,297 obs)                                 |
| <b>PAF (from MSM)</b>               | 5.27% (3.38%, 7.16%)                  | 4.78% (3.38%, 6.19%)                             |                                           |                                                      |

*MSM = marginal structural model; PAF = population attributable fraction. Unadjusted estimate is from an unweighted logit model with no additional variables. MSM adjusted for both time invariant (gender, education, ethnicity) and time-varying confounders (age, age squared, employment status [current and one year lagged], benefit status [lagged], home ownership status [lagged], marital status [lagged], number of children [lagged], government office region [lagged], SF-12 physical health component [lagged], SF-12 mental health component [lagged], and previous indication of common mental disorder [one-year lagged GHQ-12 caseness]). Adjusted fixed-effects model includes time-varying confounders. Complete cases are from observations with complete data on variables of interest from a wave and the wave preceding it.*

**Table S6: Sensitivity analysis estimating causal effects of poverty status on likelihood of common mental disorder in restricted sample present in all UKHLS waves (with and without application of longitudinal survey weights)**

|                                     | <b>Unweighted:<br/>Odds ratio</b> | <b>Weighted:<br/>Odds ratio</b> | <b>Unweighted:<br/>%-point change</b> | <b>Weighted:<br/>%-point change</b> |
|-------------------------------------|-----------------------------------|---------------------------------|---------------------------------------|-------------------------------------|
| <b>Unadjusted estimate</b>          | 1.92 (1.81, 2.03)                 | 1.32 (1.21, 1.43)               | 11.04% (9.92%, 12.15%)                | 11.71% (10.28%, 13.14%)             |
| <b>Fixed-effects estimate</b>       | 1.25 (1.15, 1.37)                 | 1.20 (1.11, 1.30)               | 6.83% (4.70%, 8.95%)                  | 5.69% (2.99%, 8.40%)                |
| <b>Fixed-effects estimate, adj.</b> | 1.95 (1.82, 2.10)                 | 1.26 (1.13, 1.40)               | 4.43% (1.13%, 7.74%)                  | 3.81% (0.11%, 7.52%)                |
| <b>MSM estimate</b>                 | 1.21 (1.12, 1.32)                 | 1.22 (1.11, 1.33)               | 2.52% (1.40%, 3.64%)                  | 2.61% (1.35%, 3.88%)                |

*Analysis completed only on individuals who participated in all nine waves of UKHLS data collection (item missingness within these observations was imputed). Weights used are the longitudinal survey weights supplied by UKHLS which adjust for initial selection and attrition/non-response. In all columns, n=14,239; obs=73,625. MSM = marginal structural model. Unadjusted estimate is from an unweighted logit model with no additional variables. MSM adjusted for both time invariant (gender, education, ethnicity) and time-varying confounders (age, age squared, employment status [current and one year lagged], benefit status [lagged], home ownership status [lagged], marital status [lagged], number of children [lagged], government office region [lagged], SF-12 physical health component [lagged], SF-12 mental health component [lagged], and previous indication of common mental disorder [one-year lagged GHQ-12 caseness]). Adjusted fixed-effects model includes time-varying confounders.*

Figure S1: Flowchart of sample selection and exclusion

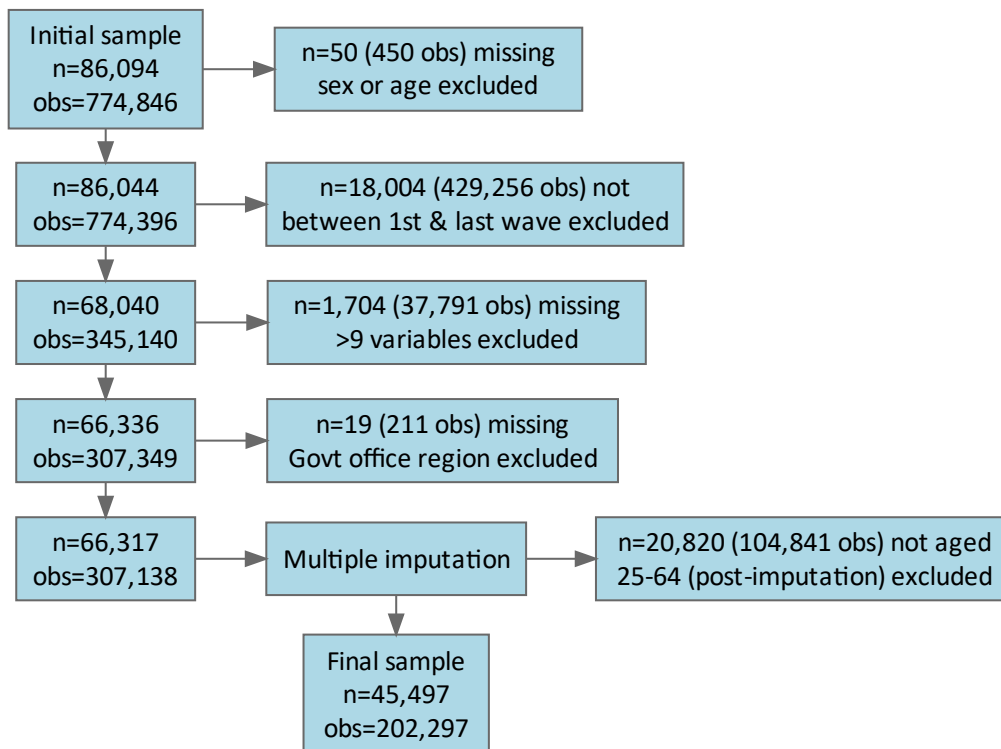

Supplement: dyac226_supplementary_data.pdf [file dyac226_supplementary_data.pdf]
